# Supplementary material for: Preparation of TiOxNy/TiN composites for photocatalytic hydrogen evolution under visible light
Source: Royal Society of Chemistry journal article supplement (doi:10.1039/c5cp04768d), 2015-01-01
Supplement: c5cp04768d1.pdf [file c5cp04768d1.pdf]

## Electronic Supporting Information

# **Preparation of $\text{TiO}_x\text{N}_y/\text{TiN}$ Composite for Photocatalytic Hydrogen Evolution under Visible Light**

*Tao Yang,<sup>a</sup> Qun Li,<sup>a</sup> Xiwang Chang,<sup>a</sup> Kuo-Chih Chou,<sup>a</sup> and Xinmei Hou<sup>\*a</sup>*

<sup>a</sup> State Key Laboratory of Advanced Metallurgy, University of Science and Technology Beijing, Beijing 100083, China

Email: [houxinmei@ustb.edu.cn](mailto:houxinmei@ustb.edu.cn)

<sup>b</sup> School of Material Science and Engineering, University of Science and Technology Beijing, Beijing 100083, China

**Table S1** Calculation conditions for geometry optimization and energy task

| Task: Geometry optimization |                                      | Energy          |                              |
|-----------------------------|--------------------------------------|-----------------|------------------------------|
| Functional                  | GGA <sup>1,2</sup> PW91 <sup>3</sup> |                 | LDA CA-PZ <sup>4,5</sup>     |
| Minimizer                   | Fine quality                         |                 | -                            |
|                             | Energy:                              | 1.0e-5 eV/atom  | -                            |
|                             | Max force:                           | 0.03 eV/        | -                            |
|                             | Max stress:                          | 0.05 GPa        | -                            |
|                             | Max displacement:                    | 0.001 Å         | -                            |
| Algorithm                   | BFGS <sup>6</sup>                    | use line search | -                            |
| Stress                      | 0 for all                            |                 | -                            |
| Energy cutoff               | 700 eV                               |                 | 700 eV                       |
| SCF tolerance               | 1.0*10 <sup>-6</sup> eV/atom         |                 | 1.0*10 <sup>-6</sup> eV/atom |
| Pseudopotentials            | Ultrasoft <sup>7</sup>               |                 | Norm-conserving <sup>8</sup> |
| FFT grid density            | Fine quality                         |                 | Standard                     |
| Finite basis correction     | Smart                                |                 | Smart                        |
| Electronic minimizer        | Density Mixing <sup>9</sup>          |                 | Density Mixing <sup>9</sup>  |
| Orbital occupancy           | Fixed                                |                 | Fixed                        |
| <i>k</i> point quality      | Fine quality                         |                 | Fine quality                 |
| Band structure              | Unchecked                            | Checked         | Fine quality k point set     |
| Density of states           | Unchecked                            | Checked         | Medium quality k point set   |

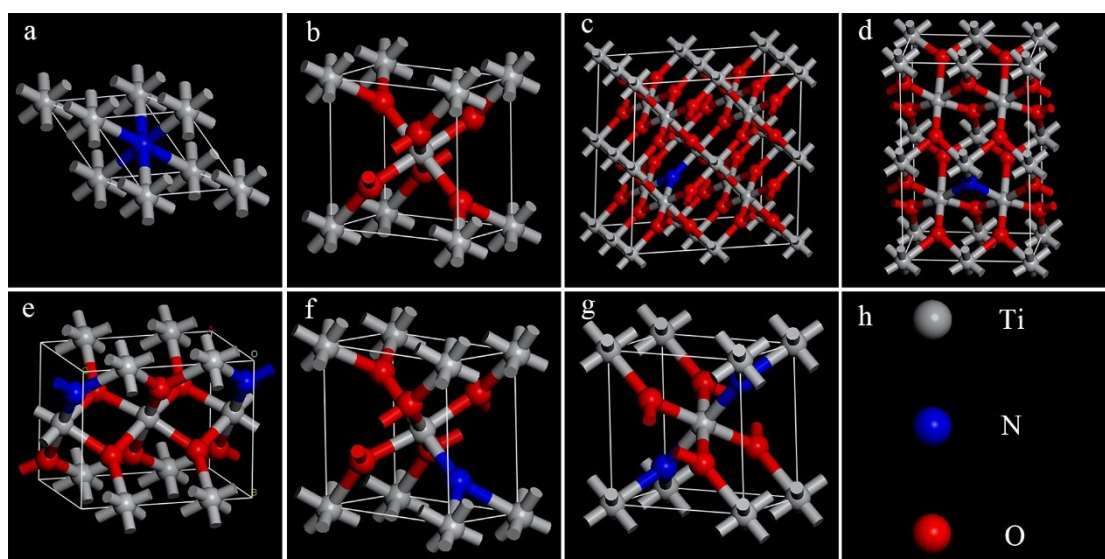

**Fig. S1. Structures of calculation models**

**Table S2 The lattice parameter and grain size of the nitridation products at different temperature with 3 h**

| Temperature<br>(°C) | 800      | 850      | 900      | 950      | 1000     | JCPDS<br>card 38-<br>1420 |
|---------------------|----------|----------|----------|----------|----------|---------------------------|
| <i>a</i> (nm)       | 0.4216   | 0.4228   | 0.4237   | 0.4241   | 0.4241   | 0.4241                    |
| Grain size<br>(nm)  | 35.5±1.5 | 36.1±1.9 | 37.0±1.6 | 37.9±1.7 | 38.5±2.4 |                           |

**Table S3 The lattice parameter and grain size of the nitridation products with different time at 900 °C**

| Time(h)            | 2        | 3        | 4        | 5        | JCPDS card<br>38-1420 |
|--------------------|----------|----------|----------|----------|-----------------------|
| <i>a</i> (nm)      | 0.4233   | 0.4236   | 0.4238   | 0.4241   | 0.4241                |
| Grain size<br>(nm) | 35.2±1.3 | 36.8±2.2 | 37.2±1.4 | 38.3±0.7 |                       |

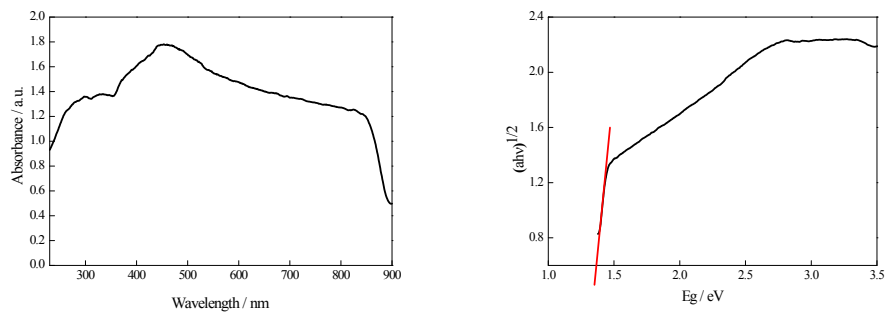

**Fig. S2.** (a) UV-vis diffuse reflection spectra of yolk-shell  $\text{TiO}_x\text{N}_y/\text{TiN}$ , (b) The plots of  $(\alpha hv)^{1/2}$  versus  $h\nu$ . The bandgap of yolk-shell  $\text{TiO}_x\text{N}_y/\text{TiN}$ .

#### ■ REFERENCES

- (1) D. C. Langreth and M. J. Mehl, *Phys. Rev. B*, 1983, **28**, 1809-1834.
- (2) A. D. Becke, *Phys. Rev. A*, 1988, **38**, 3098-3100.
- (3) Y. Wang and J. P. Perdew, *Phys. Rev. B*, 1991, **44**, 13298-13307.
- (4) D. M. Ceperley and B. J. Alder, *Phys. Rev. Lett.*, 1980, **45**, 566-569.
- (5) J. P. Perdew and A. Zunger, *Phys. Rev. B*, 1981, **23**, 5048-5079.
- (6) T. H. Fischer and J. Almlof, *J. Phys. Chem.*, 1992, **96**, 9768-9774.
- (7) D. Vanderbilt, *Phys. Rev. B*, 1990, **41**, 7892-7895.
- (8) D. R. Hamann, M. Schlüter and C. Chiang, *Phys. Rev. Lett.*, 1979, **43**, 1494-1497.
- (9) G.; Kresse and J. Furthmüller, *Phys. Rev. B*, 1996, **54**, 11169-11186.
